# Supplementary material for: Insertion of Exogenous Genes within the ORF1a Coding Region of Porcine Astrovirus
Source: Viruses. 2021 Oct 21;13(11):2119. doi: 10.3390/v13112119 (PMC8623754; doi:10.3390/v13112119)
Supplement: Supplementary file 1 [file viruses-13-02119-s001.zip › Supplementary Table 1.pdf]

**Supplementary Table 1.** The primers used in this study.

| Primer name  | Sequence(5'-3')                                 | Use                                                                     |
|--------------|-------------------------------------------------|-------------------------------------------------------------------------|
| CMVF         | GCCACTAGTTAGTTATTAATAGTAATCAATT                 | Replace the T7 promoter with the CMV promoter by overlap extension PCR  |
| NgoR         | AAGTTGAAGGCTGCATTGCGAGCA                        |                                                                         |
| CMV23R       | CCGGACTCTTTTGGAAGTTCACTAAACCAGCT                |                                                                         |
| Ngo23F       | AGCTGGTTTAGTGAACCTCCAAAAGAGTCCGG                |                                                                         |
| F3F          | AGCTCGAGGCATGCATTCTCA                           | Introduction of the ribozyme elements at the 3' end of the virus genome |
| P1           | GGAGGTGGAGATGCCATGCCGACCCTTTTTTTTTTTTTTTT       |                                                                         |
|              | TTTTTTTTTTTTTTTTTTTTTTTTTGCTTCTAATT             |                                                                         |
| P2           | GAGTGGACGTGCGTCCTCCTTCGGATGCCCAGGTCGGA          |                                                                         |
| P3           | CCGCGAGGAGGTGGAGATGCCATGCCGACCC                 |                                                                         |
|              | CCGCGGGCGCCCTCCCTTAGCCATCCGAGTGGACGTGC          |                                                                         |
|              | GTCCTCCTTC                                      |                                                                         |
| ORF1a-1606-F | TTGTTAACGACGACATTGTGGTCTCAAC                    | Construction of transposon plasmid                                      |
| ORF1a-2575-R | CTAAGCTTCTGAATCTTACTCCCAAG                      |                                                                         |
| CC-His-F     | CCAATCTTACAACCTAATcatcatcaccatcaccatGAGATTGT    | Introduction of epitope tags in the CC domain                           |
|              | TGAACTCATTC                                     |                                                                         |
| CC-His-R     | GAATGAGTTCAACAATCTCatggtgatggtgatgatgATTAGGG    |                                                                         |
|              | TTGTAAGATTGG                                    |                                                                         |
| CC-Flag-F    | CCAATCTTACAACCTAATgattacaaggatgacgacgataagGAG   |                                                                         |
|              | ATTGTTGAACTCATTC                                |                                                                         |
| CC-Flag-R    | GAATGAGTTCAACAATCTCcttatcgtcgtcatccttgaatcATTAG | Introduction of epitope tags in the VPg domain                          |
|              | GGTTGTAAGATTGG                                  |                                                                         |
| CC-HA-F      | CCAATCTTACAACCTAATtaccatacagcgtccagactacgctGA   |                                                                         |
|              | GATTGTTGAACTCATTC                               |                                                                         |
| CC-HA-R      | GAATGAGTTCAACAATCTCagcgtagtctgggacgtcgtatgggtaA |                                                                         |
|              | TTAGGGTTGTAAGATTGG                              |                                                                         |
| VPg-A-His-F  | CAAGACCAAGCGTGGGcatcatcaccatcaccatCGCACTGGGC    | Introduction of epitope tags in the VPg domain                          |
|              | AGCGGACCAATC                                    |                                                                         |
| VPg-A-His-R  | GATTGGTCCGCTGCCAGTGCGatggtgatggtgatgatgCCCA     |                                                                         |
|              | CGCTTGGTCTTG                                    |                                                                         |
| VPg-A-Flag-F | CAAGACCAAGCGTGGGgattacaaggatgacgacgataagCGCAC   |                                                                         |
|              | TGGGCAGCGGACC                                   |                                                                         |
| VPg-A-Flag-R | GGTCCGCTGCCAGTGCGcttatcgtcgtcatccttgaatcCCCACG  |                                                                         |
|              | CTTGGTCTTG                                      |                                                                         |
| VPg-A-HA-F   | CAAGACCAAGCGTGGGtaccatacagcgtccagactacgctCGCA   |                                                                         |
|              | CTGGGCAGCGGACCAATC                              |                                                                         |
| VPg-A-HA-R   | GATTGGTCCGCTGCCAGTGCGagcgtagtctgggacgtcgtatgg   |                                                                         |
|              | gtaCCCACGCTTGGTCTTG                             |                                                                         |
| VPg-B-His-F  | GTGGGCGCACTGGGCAGCGGACTcatcatcaccatcaccatCGG    |                                                                         |
|              | ACCAATCTCCGGAAAGGAGCTCG                         |                                                                         |
| VPg-B-His-R  | CGAGCTCCTTTCCGGAGATTGGTCCGatggtgatggtgatgatg    |                                                                         |

|               |                                                                                  |                                                        |
|---------------|----------------------------------------------------------------------------------|--------------------------------------------------------|
|               | AGTCCGCTGCCCAGTGCGCCCAC                                                          |                                                        |
| VPg-B-Flag-F  | GTGGGCGCACTGGGCAGCGGACTgattacaaggatgacgacgata<br>agCGGACCAATCTCCGGAAAGGAGCTCG    |                                                        |
| VPg-B-Flag-R  | CGAGCTCCTTTCCGGAGATTGGTCCGcttatcgtcgtcatccttgta<br>atcAGTCCGCTGCCCAGTGCGCCCAC    |                                                        |
| VPg-B-HA-F    | GTGGGCGCACTGGGCAGCGGACTtaccatacagcgtcccagacta<br>cgctCGGACCAATCTCCGGAAAGGAGCTCG  |                                                        |
| VPg-B-HA-R    | CGAGCTCCTTTCCGGAGATTGGTCCGagcgtagtctgggacgtc<br>gtatgggtaAGTCCGCTGCCCAGTGCGCCCAC |                                                        |
| VPg-C-His-F   | CTACGAGTACGAACGCAATcatcatcaccatcaccatGAGGAGG<br>TGGATTACGAC                      |                                                        |
| VPg-C-His-R   | GTCGTAATCCACCTCCTCatggtgatggtgatgatgATTGCGTTC<br>GTACTCGTAG                      |                                                        |
| VPg-C-Flag-F  | CTACGAGTACGAACGCAATgattacaaggatgacgacgataagGA<br>GGAGGTGGATTACGAC                |                                                        |
| VPg-C-Flag-R  | GTCGTAATCCACCTCCTCcttatcgtcgtcatccttgtaatcATTGCG<br>TTCGTAATCGTAG                |                                                        |
| VPg-C-HA-F    | CTACGAGTACGAACGCAATtaccatacagcgtcccagactacgtG<br>AGGAGGTGGATTACGAC               |                                                        |
| VPg-C-HA-R    | GTCGTAATCCACCTCCTCagcgtagtctgggacgtcgtatgggtaATT<br>GCGTTCGTAATCGTAG             |                                                        |
| HVR-His-F     | GTCAAAGCCCAGAAGCCCATTcatcatcaccatcaccatCCCAT<br>CCCTGCACCGCGCTCCCGGAAAG          |                                                        |
| HVR-His-R     | CTTTCCGGGAGCGCGGTGCAGGGATGGGatggtgatggtgat<br>gatgAATGGGCTTCTGGGCTTTGAC          |                                                        |
| HVR-Flag-F    | GTCAAAGCCCAGAAGCCCATTgattacaaggatgacgacgataag<br>CCCATCCCTGCACCGCGCTCCCGGAAAG    | Introduction of epitope tags                           |
| HVR-Flag-R    | CTTTCCGGGAGCGCGGTGCAGGGATGGGcttatcgtcgtcatcc<br>ttgtaatcAATGGGCTTCTGGGCTTTGAC    | in the HVR domain                                      |
| HVR-HA-F      | GTCAAAGCCCAGAAGCCCATTtaccatacagcgtcccagactacgc<br>tCCCATCCCTGCACCGCGCTCCCGGAAAG  |                                                        |
| HVR-HA-R      | CTTTCCGGGAGCGCGGTGCAGGGATGGGagcgtagtctggga<br>cgtcgtatgggtaAATGGGCTTCTGGGCTTTGAC |                                                        |
| HVR-AflIII-F  | GTCAAAGCCCAGAAGCCCATTCTTAAGGCCGTCGACCC<br>CATCCCTGCACCGCGCTCCCGGAAAG             | Introduction of restriction<br>sites in the HVR domain |
| HVR-SalI-R    | CTTTCCGGGAGCGCGGTGCAGGGATGGGGTTCGACGGCC<br>TTAAGAATGGGCTTCTGGGCTTTGAC            |                                                        |
| iLOV-AflIII-F | GCCTTAAGATGATAGAGAAGAATTCGTC                                                     | Amplification of iLOV                                  |
| iLOV-SalI-R   | GCGTCGACTACATGATCACTTCATCGAGC                                                    | sequence                                               |

<sup>1</sup> Epitope tags are shown as lower case letters.

<sup>2</sup> Restriction sites are shown as italics.
